# Supplementary material for: Tuning apicobasal polarity and junctional recycling in the hemogenic endothelium orchestrates the morphodynamic complexity of emerging pre-hematopoietic stem cells
Source: eLife. 2024 May 29;12:RP91429. doi: 10.7554/eLife.91429 (PMC11136496; doi:10.7554/eLife.91429)
Supplement: Supplementary file 1. [file elife-91429-supp1.xlsx]

## Sheet: Feuil1
Reagent type (species) or resource	Designation	Source or reference	Identifiers	Additional information
recombinant DNA reagent	Oligo for Cloning: 4XNR_CD8-eGFP_fw	This paper	N/A	CCTCGAAGACGCGTGGATCCACCGGTCGCCACCATGGCCTTACCAGTGACCGCCTTGCTCCTGCCGCTGGCCTTGCTGCTCCACGCCGCCAGGCCGAGCCAGTTCCGGGTGTCGGTGAGCAAGGGCGAGGAGCTGTTCACC
recombinant DNA reagent	Oligo for Cloning: delPodxl2_eGFP_rev	This paper	N/A	CTGTTTCAGTCAGATATTCGGTCCCGCCTCTAGATCCGGTGGATCCCGGGCCCGCGGTACCGTCGACTGCAGAATTCGAAGCTTGAGCTCGAGATCTGAGTCCGGACTTGTACAGCTCGTCCATGCCGAGAG
recombinant DNA reagent	Oligo for Cloning: delPodxl2_fw	This paper	N/A	GCGGGACCGAATATCTGACTGAAACAGAGCTTCATGACTCACAGGAGGCCGAACAGG
recombinant DNA reagent	Oligo for Cloning: Podxl2_pG1-4XNR_rev	This paper	N/A	CGATATCCTCGAGGGTACCGAATTCTTAAAGGTGAGTGTCTTCCTCTTGATTG
recombinant DNA reagent	Oligo for Cloning: pG1-flk1_CD8_mKate2_fw	This paper	N/A	GACGTTATTTTAACAGACAAGGGCGGTCGCCACCATGGCCTTACCAGTGACCGCCTTGCTCCTGCCGCTGGCCTTGCTGCTCCACGCCGCCAGGCCGAGCCAGTTCCGGGTGTCGGTGAGCGAGCTGATTAAGGAGAACATG
recombinant DNA reagent	Oligo for Cloning: delPodxL2-mKate2_rev	This paper	N/A	TGTTTCAGTCAGATATTCGGTCCCGCCTCTGTGCCCCAGTTTGCTAGGGAGGTC
recombinant DNA reagent	Oligo for Cloning: mKate2-delPodxL2_fw	This paper	N/A	GACCTCCCTAGCAAACTGGGGCACAGAGGCGGGACCGAATATCTGACTGAAACA
recombinant DNA reagent	Oligo for Cloning: Podxl2_PG1-flk1_rev	This paper	N/A	GCCGCGGATCCGATATCCTCGAGGGTACCGAATTCTTAAAGGTGAGTGTCTTCCTCTTGATTGTCTTCCTCGTC
recombinant DNA reagent	Oligo for Cloning: GB-4xnr-nlsRunx1-fw	This paper	N/A	TCGAAGACGCGTGGATCCACCGGTCGCCACCATGGTTCCAAAGAAGAAG
recombinant DNA reagent	Oligo for Cloning: GB-eGFP-T2A-2xHA-delRunx1rev	This paper	N/A	CCCGGTGAACAGCTCCTCGCCCTTGCTCACCATAGGTCCAGGATTCTCCTCCACGTCTCCGCATGTCAGCAGACTTCCTCTTCCCTCTGCGTAATCAGGCACATCATAAGGATAAGCGTAGTCTGGGACGTCGTATGGGTAGGGAATCTGGCTGTGGGCGGGGCTGCCGAAGGG
recombinant DNA reagent	Oligo: qPCR pard3ab forward	This paper	N/A	ATTGGAGCGTGGTGGAAAGG
recombinant DNA reagent	Oligo: qPCR pard3ab reverse	This paper	N/A	TGAGCTTGCTCAAAGCGAAC
recombinant DNA reagent	Oligo: qPCR pard3b forward	This paper	N/A	GAGAATGACTGCATCGTCCG
recombinant DNA reagent	Oligo: qPCR pard3b reverse	This paper	N/A	ACATGAAACAGGATTCGCGG
recombinant DNA reagent	Oligo: qPCR pard3bb forward	This paper	N/A	GAAGGCCTCTGGGTCTTCAC
recombinant DNA reagent	Oligo: qPCR pard3bb reverse	This paper	N/A	AGATGCCTTCCCGTTTGGAG
recombinant DNA reagent	Oligo: qPCR pard3ba forward	This paper	N/A	GGCCTCTGGGAATCAAAGTC
recombinant DNA reagent	Oligo: qPCR pard3ba reverse	This paper	N/A	TCTCTGAGCGGCTGTTCTTC
recombinant DNA reagent	Oligo: qPCR cmyb reverse	N/A	N/A	TCCTGGGGCTCTTGTTTAATCGT
recombinant DNA reagent	Oligo: qPCR cmyb forward	N/A	N/A	GCACACCCACTCCATTCAAATCC
recombinant DNA reagent	Oligo: qPCR runx1 reverse	N/A	N/A	TGAGCAGTCGTACCCATATCTG
recombinant DNA reagent	Oligo: qPCR runx1 forward	N/A	N/A	AGATGGGAGTGATGGGAAGG
recombinant DNA reagent	Oligo: qPCR ef1a forward	NA	N/A	CAGCATTATCCAGTCCTTAAGTAGAGTGC
recombinant DNA reagent	Oligo: qPCR ef1a reverse	NA	N/A	GCGTCATCAAGAGCGTTGAGAAG
recombinant DNA reagent	Oligo for Cloning: PG1-HSP70-tol2-jam2a-eGFP_c1_f	This paper	N/A	CCTGGAATTCGGTACCCTCGAGGATGCCACCATGCTGGTGTGCGTGTCTCTGCTG
recombinant DNA reagent	Oligo for Cloning: PG1-HSP70-tol2-jam2a-eGFP_c1_r	This paper	N/A	TTGCTCACCATGGCGCGCCTATCGATCTGCATGTGTGTGTGCTG
recombinant DNA reagent	Oligo for Cloning: PG1-HSP70-tol2-jam2a-eGFP_c2_f	This paper	N/A	ACATGCAGATCGATAGGCGCGCCATGGTGAGCAAGGGCGAGGAGC
recombinant DNA reagent	Oligo for Cloning: PG1-HSP70-tol2-jam2a-eGFP_c2_r	This paper	N/A	ACGTTCAGGTCGGCGCGCCTCTTGTACAGCTCGTCCATGCCG
recombinant DNA reagent	Oligo for Cloning: PG1-HSP70-tol2-jam2a-eGFP_c3_f	This paper	N/A	GCTGTACAAGAGGCGCGCCGACCTGAACGTGGCGGCGGTGG
recombinant DNA reagent	Oligo for Cloning: PG1-HSP70-tol2-jam2a-eGFP_c3_r	This paper	N/A	TTATGATCGCGGCCGCGGATCCGATCTACAGCATGAAGGACTGCGTGTGC
recombinant DNA reagent	Oligo for Cloning: PG1-HSP70-tol2-jam3b-eGFP_c1_r	This paper	N/A	TTGCTCACCATGGCGCGCCTATAAACTTCCATCATCTGCGGTCC
recombinant DNA reagent	Oligo for Cloning: PG1-HSP70-tol2-jam3b-eGFP_c2_f	This paper	N/A	TGATGGAAGTTTATAGGCGCGCCATGGTGAGCAAGGGCGAGGAGC
recombinant DNA reagent	Oligo for Cloning: PG1-HSP70-tol2-jam3b-eGFP_c3_r	This paper	N/A	ATTATGATCGCGGCCGCGGATCCGATTCAGATGACAAATGAGGATTTGTGC
recombinant DNA reagent	Oligo for Cloning: PG1-HSP70-tol2-jam3b-eGFP_c1_f	This paper	N/A	TTTCCTGGAATTCGGTACCCTCGAGGATGCCACCATGCTGGTGTGCGTGTCTCTGCTGATATTAATTCACAGCGTCCCTGTGTCTCCCGTCACCGTCAGCAGTCGCAATTCTAAACCGTGGGTCAACGAG
recombinant DNA reagent	Oligo for Cloning: PG1-HSP70-tol2-jam3b-eGFP_c3_f	This paper	N/A	AGCTGTACAAGAGGCGCGCCGACATCAACATTGCCGGCATCATC
recombinant DNA reagent	Oligo for Cloning: PG1-HSP70-tol2-jam3b-eGFP_c2_r	This paper	N/A	CAATGTTGATGTCGGCGCGCCTCTTGTACAGCTCGTCCATGCCG
recombinant DNA reagent	Oligo: qPCR ArhGEF11_forward	This paper	N/A	ATCACAGAGCAGCGTCCAG
recombinant DNA reagent	Oligo: qPCR ArhGEF11_reverse	This paper	N/A	AGTTTGTGGTGATCCGCTTC
recombinant DNA reagent	Oligo: qPCR ArhGEF12a_forward	This paper	N/A	AGGATTACGCAGCGTACCTG
recombinant DNA reagent	Oligo: qPCR ArhGEF12a_reverse	This paper	N/A	TCAGGCTGATCCCAGAGTCA
recombinant DNA reagent	Oligo: qPCR ArhGEF12b_forward	This paper	N/A	TTCTCAAAGCACTGGAGGACC
recombinant DNA reagent	Oligo: qPCR ArhGEF12b_reverse	This paper	N/A	CTTGATTTCGGTCTCCTTCAGC
recombinant DNA reagent	Oligo: qPCR Prex1_forward	This paper	N/A	TGTGTCGTTGGAGCAAGCTA
recombinant DNA reagent	Oligo: qPCR Prex1_reverse	This paper	N/A	GCGGCATCTGGTCCATTACT
recombinant DNA reagent	Oligo: qPCR Prex2_forward	This paper	N/A	CGCTAAGTGTCACGTTGGAAC
recombinant DNA reagent	Oligo: qPCR Prex2_reverse	This paper	N/A	TGCGATCTCTCACTCCCAGA
recombinant DNA reagent	Oligo: qPCR Tiam1a_forward	This paper	N/A	CACGACCCACCATGAACAGA
recombinant DNA reagent	Oligo: qPCR Tiam1a_reverse	This paper	N/A	TTCTGTGGGGGTGATTGGTG
recombinant DNA reagent	Oligo: qPCR Tiam1b_forward	This paper	N/A	AAGGACTGCAAATCCCAGCA
recombinant DNA reagent	Oligo: qPCR Tiam1b_reverse	This paper	N/A	TGTGTCTCGTTCTCTGCACC
recombinant DNA reagent	Oligo: qPCR Tiam2a_forward	This paper	N/A	CGTCGAAACATGCAAAGGGT
recombinant DNA reagent	Oligo: qPCR Tiam2a_reverse	This paper	N/A	CGGGACTGTCGTTTGAAGGT
recombinant DNA reagent	Oligo: qPCR Tiam2b_forward	This paper	N/A	TGTGTCGTTGGAGCAAGCTA
recombinant DNA reagent	Oligo: qPCR Tiam2b_reverse	This paper	N/A	GCGGCATCTGGTCCATTACT
recombinant DNA reagent	Oligo for WISH probe: ArhGEF11 fw	This paper	N/A	TGAAGAGTGTCCGGATGAAGATCCAGACGC
recombinant DNA reagent	Oligo for WISH probe: ArhGEF11 T7rev	This paper	N/A	GAAATTAATACGACTCACTATAGGGTCAGAAACCAGTGGACTGGATTTGAGGTTG
recombinant DNA reagent	Oligo for WISH probe: ArhGEF12a fw	This paper	N/A	CGACAGAGACGGTGTGGAGTTAAGCAAGTTC
recombinant DNA reagent	Oligo for WISH probe: ArhGEF12a T7rev	This paper	N/A	GAAATTAATACGACTCACTATAGGGTGCTGATCCGACAGGCCTTTGGCGAAG
recombinant DNA reagent	Oligo for WISH probe: ArhGEF12b fw	This paper	N/A	ACACTGAACCAATTACTTTAGCGAGCATCC
recombinant DNA reagent	Oligo for WISH probe: ArhGEF12b T7rev	This paper	N/A	GAAATTAATACGACTCACTATAGGGATAGCCTTTGGCGTAGCTGGTTATACTTG
recombinant DNA reagent	Oligo for WISH probe: PREX1 fw	This paper	N/A	TCGATCAAATCTCTAATTAACAGCCTTCACC
recombinant DNA reagent	Oligo for WISH probe: PREX1 T7rev	This paper	N/A	GAAATTAATACGACTCACTATAGGGATTGCAGAGCTCAGAGGACACCAGCAG
recombinant DNA reagent	Oligo for WISH probe: PREX2 fw	This paper	N/A	GTGTTAAATCAAGCTCTGAGCACTGAGAG
recombinant DNA reagent	Oligo for WISH probe: PREX2 T7rev	This paper	N/A	GAAATTAATACGACTCACTATAGGGACTGCACAGCTCTGAAGCCACGGTGAG
recombinant DNA reagent	Oligo for WISH probe: Tiam1a fw	This paper	N/A	CAAGTTCGCAATCTCCCAAATTCCGAGG
recombinant DNA reagent	Oligo for WISH probe: Tiam1a T7rev	This paper	N/A	GAAATTAATACGACTCACTATAGGGCAGAAGATGTCACTGTTGCAGCTGT
recombinant DNA reagent	Oligo for WISH probe: Tiam1b fw	This paper	N/A	CACGCTGTCCAACACAGATGGAGAGAG
recombinant DNA reagent	Oligo for WISH probe: Tiam1b T7rev	This paper	N/A	GAAATTAATACGACTCACTATAGGGCTCTGGCTTTCGTCCTGTGTCTCGTTCTC
recombinant DNA reagent	Oligo for WISH probe: Tiam2a fw	This paper	N/A	TCACAAAAGGAGGGCAGGCCTGAGACG
recombinant DNA reagent	Oligo for WISH probe: Tiam2a T7rev	This paper	N/A	GAAATTAATACGACTCACTATAGGGTGAAGTTGTCACATTCTTTGGCTCCATGG
recombinant DNA reagent	Oligo for WISH probe: Tiam2b fw	This paper	N/A	CTCTTTGGGCCGCATGAGGAAAGACC
recombinant DNA reagent	Oligo for WISH probe: Tiam2b T7rev	This paper	N/A	GAAATTAATACGACTCACTATAGGGTGGATGCCCATGAGCGTATCGTAAAAGC
recombinant DNA reagent	Oligo for ArhGEF11 exon 38 alternative splicing screen: SM33 forward	This paper	N/A	CTGTCGTCACACCGGCTGATGCAG
recombinant DNA reagent	Oligo for ArhGEF11 exon 38 alternative splicing screen: SM30 reverse	This paper	N/A	AGTTTGTGGTGATCCGCTTC
recombinant DNA reagent	Oligo for CRISPR PCR screen: SM31	This paper	N/A	TTTCACTTTCTCTCTGCCTCTTACA
recombinant DNA reagent	Oligo for CRISPR PCR screen: SM32bis	This paper	N/A	AACTCTGTCCAGATGATTGAGGAGC
recombinant DNA reagent	Oligo for CRISPR PCR screen: SM34	This paper	N/A	ATAAATGAAGCCCCACCTCCGTCC
recombinant DNA reagent	Oligo for CRISPR PCR screen: SM40	This paper	N/A	ATGAAGCCCCACCTCAGACGATTGGC
